# Supplementary material
Source: Springer Nature journal article supplement (https://www.springermedizin.de/resource/supplementary/12885_2012_4148_MOESM3_ESM.pdf/9465606)
Supplement: MOESM3 [file 9465606]

| <b>Gene Symbol</b> | <b>FoldChange</b> | <b>FoldChange Description</b> | <b>Gene Symbol</b> | <b>FoldChange</b> | <b>FoldChange Description</b> |
|--------------------|-------------------|-------------------------------|--------------------|-------------------|-------------------------------|
| <b>ABCA10</b>      | 2.34              | SCC25 10b down vs Scramble    | <b>AAA1</b>        | 5.19              | SCC25 10b up vs Scramble      |
| <b>ABHD16B</b>     | 2.10              | SCC25 10b down vs Scramble    | <b>AADACL4</b>     | 2.36              | SCC25 10b up vs Scramble      |
| <b>ADAM9</b>       | 1.91              | SCC25 10b down vs Scramble    | <b>ABCG2</b>       | 2.10              | SCC25 10b up vs Scramble      |
| <b>ADAMTS12</b>    | 4.49              | SCC25 10b down vs Scramble    | <b>ADRB3</b>       | 2.11              | SCC25 10b up vs Scramble      |
| <b>ADH1C</b>       | 2.62              | SCC25 10b down vs Scramble    | <b>AFM</b>         | 4.14              | SCC25 10b up vs Scramble      |
| <b>AHSP</b>        | 2.22              | SCC25 10b down vs Scramble    | <b>AMHR2</b>       | 2.13              | SCC25 10b up vs Scramble      |
| <b>AOX2P</b>       | 2.25              | SCC25 10b down vs Scramble    | <b>ANKK1</b>       | 7.45              | SCC25 10b up vs Scramble      |
| <b>APOBEC2</b>     | 2.09              | SCC25 10b down vs Scramble    | <b>AQP9</b>        | 2.43              | SCC25 10b up vs Scramble      |
| <b>APOBEC3D</b>    | 2.36              | SCC25 10b down vs Scramble    | <b>ASCL1</b>       | 2.25              | SCC25 10b up vs Scramble      |
| <b>ARID3C</b>      | 2.18              | SCC25 10b down vs Scramble    | <b>ATPBD4</b>      | 2.79              | SCC25 10b up vs Scramble      |
| <b>ATOH7</b>       | 2.53              | SCC25 10b down vs Scramble    | <b>AVPR2</b>       | 1.96              | SCC25 10b up vs Scramble      |
| <b>ATP8B2</b>      | 2.03              | SCC25 10b down vs Scramble    | <b>B3GALT2</b>     | 2.93              | SCC25 10b up vs Scramble      |
| <b>BPIL2</b>       | 2.19              | SCC25 10b down vs Scramble    | <b>B3GAT2</b>      | 3.03              | SCC25 10b up vs Scramble      |

|                  |      |                            |         |      |                          |
|------------------|------|----------------------------|---------|------|--------------------------|
|                  |      | Scramble                   |         |      |                          |
| <b>BTNL9</b>     | 1.96 | SCC25 10b down vs Scramble | BBOX1   | 3.36 | SCC25 10b up vs Scramble |
| <b>CA7</b>       | 2.40 | SCC25 10b down vs Scramble | BEND2   | 2.52 | SCC25 10b up vs Scramble |
| <b>CACNG8</b>    | 4.30 | SCC25 10b down vs Scramble | BRSK1   | 1.94 | SCC25 10b up vs Scramble |
| <b>CADPS2</b>    | 2.00 | SCC25 10b down vs Scramble | BTBD17  | 2.52 | SCC25 10b up vs Scramble |
| <b>CALCA</b>     | 3.87 | SCC25 10b down vs Scramble | CCDC36  | 2.89 | SCC25 10b up vs Scramble |
| <b>CCDC151</b>   | 2.25 | SCC25 10b down vs Scramble | CCDC48  | 2.71 | SCC25 10b up vs Scramble |
| <b>CCDC155</b>   | 1.90 | SCC25 10b down vs Scramble | CD300LD | 1.99 | SCC25 10b up vs Scramble |
| <b>CCNB3</b>     | 6.76 | SCC25 10b down vs Scramble | CD300LG | 6.54 | SCC25 10b up vs Scramble |
| <b>CDH15</b>     | 1.96 | SCC25 10b down vs Scramble | CDRT7   | 5.30 | SCC25 10b up vs Scramble |
| <b>CDHR1</b>     | 2.08 | SCC25 10b down vs Scramble | CLDN25  | 2.03 | SCC25 10b up vs Scramble |
| <b>CHKB</b>      | 2.92 | SCC25 10b down vs Scramble | CLEC14A | 2.64 | SCC25 10b up vs Scramble |
| <b>CHST9-AS1</b> | 3.34 | SCC25 10b down vs Scramble | CPA3    | 3.13 | SCC25 10b up vs Scramble |
| <b>CLCNKB</b>    | 2.10 | SCC25 10b down vs Scramble | CRHR2   | 2.17 | SCC25 10b up vs Scramble |

|                 |       |                            |          |      |                          |
|-----------------|-------|----------------------------|----------|------|--------------------------|
| <b>CLEC1B</b>   | 2.44  | SCC25 10b down vs Scramble | CTRB1    | 3.34 | SCC25 10b up vs Scramble |
| <b>CNGA4</b>    | 5.80  | SCC25 10b down vs Scramble | CYP4F11  | 2.85 | SCC25 10b up vs Scramble |
| <b>CNR1</b>     | 16.89 | SCC25 10b down vs Scramble | DEFA8P   | 1.95 | SCC25 10b up vs Scramble |
| <b>CNTF</b>     | 1.90  | SCC25 10b down vs Scramble | DEPDC4   | 2.21 | SCC25 10b up vs Scramble |
| <b>COL6A5</b>   | 2.45  | SCC25 10b down vs Scramble | DLX3     | 2.51 | SCC25 10b up vs Scramble |
| <b>CPNE9</b>    | 2.19  | SCC25 10b down vs Scramble | DMRT3    | 3.94 | SCC25 10b up vs Scramble |
| <b>CR737729</b> | 2.36  | SCC25 10b down vs Scramble | DNM1P35  | 2.27 | SCC25 10b up vs Scramble |
| <b>CSMD3</b>    | 2.37  | SCC25 10b down vs Scramble | FAM49A   | 1.98 | SCC25 10b up vs Scramble |
| <b>CST2</b>     | 28.44 | SCC25 10b down vs Scramble | FAM65B   | 2.15 | SCC25 10b up vs Scramble |
| <b>CTXN3</b>    | 3.42  | SCC25 10b down vs Scramble | FAM90A7  | 3.15 | SCC25 10b up vs Scramble |
| <b>CXCL9</b>    | 2.01  | SCC25 10b down vs Scramble | FBXW10   | 2.27 | SCC25 10b up vs Scramble |
| <b>CYLC2</b>    | 2.19  | SCC25 10b down vs Scramble | FGF17    | 4.51 | SCC25 10b up vs Scramble |
| <b>CYP46A1</b>  | 1.97  | SCC25 10b down vs Scramble | FHDC1    | 1.91 | SCC25 10b up vs Scramble |
| <b>DCDC2B</b>   | 2.66  | SCC25 10b down vs Scramble | FLJ42022 | 2.22 | SCC25 10b up vs Scramble |

|                 |      |                            |          |      |                          |
|-----------------|------|----------------------------|----------|------|--------------------------|
|                 |      | Scramble                   |          |      |                          |
| <b>DEFA7P</b>   | 1.92 | SCC25 10b down vs Scramble | FLJ45684 | 2.73 | SCC25 10b up vs Scramble |
| <b>DEFB104B</b> | 2.02 | SCC25 10b down vs Scramble | FOXJ1    | 2.25 | SCC25 10b up vs Scramble |
| <b>DEFB133</b>  | 3.52 | SCC25 10b down vs Scramble | FP588    | 2.11 | SCC25 10b up vs Scramble |
| <b>DKKL1</b>    | 2.78 | SCC25 10b down vs Scramble | GALR2    | 3.44 | SCC25 10b up vs Scramble |
| <b>DNAH1</b>    | 2.68 | SCC25 10b down vs Scramble | GATA5    | 2.09 | SCC25 10b up vs Scramble |
| <b>DNAL1</b>    | 2.04 | SCC25 10b down vs Scramble | GCET2    | 2.06 | SCC25 10b up vs Scramble |
| <b>DRD3</b>     | 3.90 | SCC25 10b down vs Scramble | GDF10    | 1.97 | SCC25 10b up vs Scramble |
| <b>DYDC2</b>    | 2.05 | SCC25 10b down vs Scramble | GHRLOS2  | 2.01 | SCC25 10b up vs Scramble |
| <b>EFNA5</b>    | 3.96 | SCC25 10b down vs Scramble | GNAT2    | 2.53 | SCC25 10b up vs Scramble |
| <b>EGFL6</b>    | 3.03 | SCC25 10b down vs Scramble | GPR144   | 2.30 | SCC25 10b up vs Scramble |
| <b>ESRRG</b>    | 2.14 | SCC25 10b down vs Scramble | GPR156   | 2.27 | SCC25 10b up vs Scramble |
| <b>FAM101A</b>  | 2.43 | SCC25 10b down vs Scramble | GPR179   | 5.85 | SCC25 10b up vs Scramble |
| <b>FAM123A</b>  | 2.37 | SCC25 10b down vs Scramble | GPR18    | 4.77 | SCC25 10b up vs Scramble |

|                 |      |                            |           |       |                          |
|-----------------|------|----------------------------|-----------|-------|--------------------------|
| <b>FAM47E</b>   | 2.68 | SCC25 10b down vs Scramble | GPR63     | 1.97  | SCC25 10b up vs Scramble |
| <b>FCGR2B</b>   | 3.08 | SCC25 10b down vs Scramble | GRM2      | 2.01  | SCC25 10b up vs Scramble |
| <b>FGF14</b>    | 1.92 | SCC25 10b down vs Scramble | HAL       | 1.99  | SCC25 10b up vs Scramble |
| <b>FLJ13744</b> | 2.68 | SCC25 10b down vs Scramble | HHIPL2    | 2.60  | SCC25 10b up vs Scramble |
| <b>FLJ16124</b> | 4.74 | SCC25 10b down vs Scramble | HIST1H2AA | 2.45  | SCC25 10b up vs Scramble |
| <b>FLJ34690</b> | 2.38 | SCC25 10b down vs Scramble | HTN1      | 10.07 | SCC25 10b up vs Scramble |
| <b>FLJ42969</b> | 3.09 | SCC25 10b down vs Scramble | IL12RB1   | 1.98  | SCC25 10b up vs Scramble |
| <b>FLJ44511</b> | 2.76 | SCC25 10b down vs Scramble | IQCF6     | 2.18  | SCC25 10b up vs Scramble |
| <b>FLJ45079</b> | 4.89 | SCC25 10b down vs Scramble | JOSD2     | 2.25  | SCC25 10b up vs Scramble |
| <b>FLJ45950</b> | 2.55 | SCC25 10b down vs Scramble | KCND1     | 10.06 | SCC25 10b up vs Scramble |
| <b>FMO1</b>     | 2.97 | SCC25 10b down vs Scramble | KCNH6     | 9.19  | SCC25 10b up vs Scramble |
| <b>FMR1-AS1</b> | 3.79 | SCC25 10b down vs Scramble | KIAA0889  | 1.96  | SCC25 10b up vs Scramble |
| <b>FN3K</b>     | 2.53 | SCC25 10b down vs Scramble | KIAA1468  | 2.07  | SCC25 10b up vs Scramble |
| <b>FRG2</b>     | 6.82 | SCC25 10b down vs Scramble | KLHL15    | 2.23  | SCC25 10b up vs Scramble |

|               |       |                            |         |      |                          |
|---------------|-------|----------------------------|---------|------|--------------------------|
|               |       | Scramble                   |         |      |                          |
| <b>FUT10</b>  | 3.19  | SCC25 10b down vs Scramble | KLHL38  | 1.95 | SCC25 10b up vs Scramble |
| <b>FUT5</b>   | 1.99  | SCC25 10b down vs Scramble | KPNA7   | 2.01 | SCC25 10b up vs Scramble |
| <b>GABRA2</b> | 1.94  | SCC25 10b down vs Scramble | KRT4    | 2.09 | SCC25 10b up vs Scramble |
| <b>GGNBP1</b> | 2.81  | SCC25 10b down vs Scramble | KRT78   | 2.25 | SCC25 10b up vs Scramble |
| <b>GJB6</b>   | 2.90  | SCC25 10b down vs Scramble | KY      | 5.97 | SCC25 10b up vs Scramble |
| <b>GJC3</b>   | 2.19  | SCC25 10b down vs Scramble | LDLRAD2 | 3.48 | SCC25 10b up vs Scramble |
| <b>GNGT1</b>  | 2.11  | SCC25 10b down vs Scramble | LILRB2  | 2.56 | SCC25 10b up vs Scramble |
| <b>GP1BA</b>  | 2.69  | SCC25 10b down vs Scramble | LIPG    | 2.12 | SCC25 10b up vs Scramble |
| <b>GPR101</b> | 3.34  | SCC25 10b down vs Scramble | LRP2    | 2.29 | SCC25 10b up vs Scramble |
| <b>GPR62</b>  | 58.77 | SCC25 10b down vs Scramble | LRRK2   | 2.12 | SCC25 10b up vs Scramble |
| <b>HCAR2</b>  | 2.50  | SCC25 10b down vs Scramble | LYZL1   | 3.33 | SCC25 10b up vs Scramble |
| <b>HES5</b>   | 3.61  | SCC25 10b down vs Scramble | MAGEB17 | 2.09 | SCC25 10b up vs Scramble |
| <b>HHATL</b>  | 2.17  | SCC25 10b down vs Scramble | MRS2P2  | 9.38 | SCC25 10b up vs Scramble |

|                 |      |                            |         |      |                          |
|-----------------|------|----------------------------|---------|------|--------------------------|
| <b>HIST1H4G</b> | 3.48 | SCC25 10b down vs Scramble | MS4A13  | 2.13 | SCC25 10b up vs Scramble |
| <b>HNF1B</b>    | 2.04 | SCC25 10b down vs Scramble | MST152  | 2.67 | SCC25 10b up vs Scramble |
| <b>HOTAIR</b>   | 1.95 | SCC25 10b down vs Scramble | MYH16   | 3.22 | SCC25 10b up vs Scramble |
| <b>HOXA2</b>    | 2.30 | SCC25 10b down vs Scramble | NCAN    | 2.05 | SCC25 10b up vs Scramble |
| <b>HPGD</b>     | 2.71 | SCC25 10b down vs Scramble | NCOA2   | 2.23 | SCC25 10b up vs Scramble |
| <b>HTRA4</b>    | 2.02 | SCC25 10b down vs Scramble | NMNAT2  | 2.04 | SCC25 10b up vs Scramble |
| <b>HUNK</b>     | 2.29 | SCC25 10b down vs Scramble | NPS     | 8.15 | SCC25 10b up vs Scramble |
| <b>ICOS</b>     | 2.04 | SCC25 10b down vs Scramble | NTNG2   | 4.49 | SCC25 10b up vs Scramble |
| <b>INE1</b>     | 2.07 | SCC25 10b down vs Scramble | NXF2    | 1.93 | SCC25 10b up vs Scramble |
| <b>IPMK</b>     | 2.24 | SCC25 10b down vs Scramble | OR14A16 | 1.99 | SCC25 10b up vs Scramble |
| <b>IRF2BP2</b>  | 2.44 | SCC25 10b down vs Scramble | OR1F1   | 2.78 | SCC25 10b up vs Scramble |
| <b>KLHDC1</b>   | 2.10 | SCC25 10b down vs Scramble | OR2A20P | 2.19 | SCC25 10b up vs Scramble |
| <b>KLRD1</b>    | 1.99 | SCC25 10b down vs Scramble | OR2T33  | 2.58 | SCC25 10b up vs Scramble |
| <b>KRT75</b>    | 1.96 | SCC25 10b down vs Scramble | OR51E2  | 2.27 | SCC25 10b up vs Scramble |

|                  |      |                            |         |      |                          |
|------------------|------|----------------------------|---------|------|--------------------------|
|                  |      | Scramble                   |         |      |                          |
| <b>KRTAP23-1</b> | 2.63 | SCC25 10b down vs Scramble | OR52E8  | 2.14 | SCC25 10b up vs Scramble |
| <b>LCE2B</b>     | 2.97 | SCC25 10b down vs Scramble | OR56A4  | 5.04 | SCC25 10b up vs Scramble |
| <b>LCE6A</b>     | 2.07 | SCC25 10b down vs Scramble | OR5F1   | 1.96 | SCC25 10b up vs Scramble |
| <b>LHX5</b>      | 7.82 | SCC25 10b down vs Scramble | OR8G1   | 3.05 | SCC25 10b up vs Scramble |
| <b>LIMD2</b>     | 2.56 | SCC25 10b down vs Scramble | PALM2   | 1.99 | SCC25 10b up vs Scramble |
| <b>LIPM</b>      | 2.39 | SCC25 10b down vs Scramble | PARP15  | 2.90 | SCC25 10b up vs Scramble |
| <b>LIPN</b>      | 2.21 | SCC25 10b down vs Scramble | PDE3A   | 2.45 | SCC25 10b up vs Scramble |
| <b>LRIT3</b>     | 1.96 | SCC25 10b down vs Scramble | PEBP4   | 2.44 | SCC25 10b up vs Scramble |
| <b>LRRC7</b>     | 2.19 | SCC25 10b down vs Scramble | PLA2G7  | 1.98 | SCC25 10b up vs Scramble |
| <b>MAB21L3</b>   | 2.53 | SCC25 10b down vs Scramble | PLVAP   | 2.35 | SCC25 10b up vs Scramble |
| <b>MARK1</b>     | 3.31 | SCC25 10b down vs Scramble | PNMA6A  | 1.94 | SCC25 10b up vs Scramble |
| <b>MCCD1</b>     | 1.94 | SCC25 10b down vs Scramble | PP2D1   | 5.41 | SCC25 10b up vs Scramble |
| <b>MEGF10</b>    | 2.03 | SCC25 10b down vs Scramble | PRHOXNB | 3.81 | SCC25 10b up vs Scramble |



|                 |       |                            |         |      |                          |
|-----------------|-------|----------------------------|---------|------|--------------------------|
| <b>MGAM</b>     | 2.68  | SCC25 10b down vs Scramble | PRO0611 | 2.53 | SCC25 10b up vs Scramble |
| <b>MGC12916</b> | 1.96  | SCC25 10b down vs Scramble | PRR5L   | 1.90 | SCC25 10b up vs Scramble |
| <b>MS4A6E</b>   | 8.72  | SCC25 10b down vs Scramble | PYDC2   | 1.92 | SCC25 10b up vs Scramble |
| <b>MTCP1</b>    | 2.39  | SCC25 10b down vs Scramble | RAB14   | 2.05 | SCC25 10b up vs Scramble |
| <b>MYL2</b>     | 2.12  | SCC25 10b down vs Scramble | RABIF   | 3.56 | SCC25 10b up vs Scramble |
| <b>MYLK3</b>    | 2.21  | SCC25 10b down vs Scramble | REG1B   | 2.13 | SCC25 10b up vs Scramble |
| <b>MYO7B</b>    | 2.31  | SCC25 10b down vs Scramble | RESP18  | 1.92 | SCC25 10b up vs Scramble |
| <b>NBPF7</b>    | 3.91  | SCC25 10b down vs Scramble | RIMS1   | 3.04 | SCC25 10b up vs Scramble |
| <b>NEU3</b>     | 3.56  | SCC25 10b down vs Scramble | RNU105B | 1.93 | SCC25 10b up vs Scramble |
| <b>NEUROD2</b>  | 2.07  | SCC25 10b down vs Scramble | SAMD8   | 1.95 | SCC25 10b up vs Scramble |
| <b>NOTO</b>     | 2.01  | SCC25 10b down vs Scramble | SCN7A   | 2.89 | SCC25 10b up vs Scramble |
| <b>NPHS1</b>    | 1.96  | SCC25 10b down vs Scramble | SEMG2   | 2.35 | SCC25 10b up vs Scramble |
| <b>ODF4</b>     | 2.08  | SCC25 10b down vs Scramble | SGIP1   | 2.51 | SCC25 10b up vs Scramble |
| <b>OPRK1</b>    | 14.25 | SCC25 10b down vs Scramble | SGPP2   | 3.12 | SCC25 10b up vs Scramble |

|               |      |                            |          |      |                          |
|---------------|------|----------------------------|----------|------|--------------------------|
|               |      | Scramble                   |          |      |                          |
| <b>OR13F1</b> | 4.18 | SCC25 10b down vs Scramble | SIPA1L3  | 2.27 | SCC25 10b up vs Scramble |
| <b>OR1S1</b>  | 2.51 | SCC25 10b down vs Scramble | SLC24A2  | 2.18 | SCC25 10b up vs Scramble |
| <b>OR2A2</b>  | 2.38 | SCC25 10b down vs Scramble | SLC29A2  | 2.43 | SCC25 10b up vs Scramble |
| <b>OR2J2</b>  | 2.19 | SCC25 10b down vs Scramble | SLC39A12 | 3.84 | SCC25 10b up vs Scramble |
| <b>OR2Z1</b>  | 1.92 | SCC25 10b down vs Scramble | SLC44A4  | 2.03 | SCC25 10b up vs Scramble |
| <b>OR3A1</b>  | 9.94 | SCC25 10b down vs Scramble | SLC4A8   | 2.40 | SCC25 10b up vs Scramble |
| <b>OR4A5</b>  | 1.90 | SCC25 10b down vs Scramble | SLC5A1   | 1.93 | SCC25 10b up vs Scramble |
| <b>OR51D1</b> | 3.31 | SCC25 10b down vs Scramble | SLC7A7   | 2.56 | SCC25 10b up vs Scramble |
| <b>OR6M1</b>  | 2.21 | SCC25 10b down vs Scramble | SLC8A1   | 1.99 | SCC25 10b up vs Scramble |
| <b>OR6V1</b>  | 1.97 | SCC25 10b down vs Scramble | SMTNL1   | 2.46 | SCC25 10b up vs Scramble |
| <b>OR7A17</b> | 7.83 | SCC25 10b down vs Scramble | SPAG8    | 4.31 | SCC25 10b up vs Scramble |
| <b>OR8H3</b>  | 2.00 | SCC25 10b down vs Scramble | SPAM1    | 5.83 | SCC25 10b up vs Scramble |
| <b>OR8K5</b>  | 7.99 | SCC25 10b down vs Scramble | SPINK2   | 2.82 | SCC25 10b up vs Scramble |

|                |        |                            |         |      |                          |
|----------------|--------|----------------------------|---------|------|--------------------------|
| <b>OR9Q1</b>   | 3.13   | SCC25 10b down vs Scramble | SPRR1B  | 1.95 | SCC25 10b up vs Scramble |
| <b>P2RX3</b>   | 3.19   | SCC25 10b down vs Scramble | SPTB    | 2.46 | SCC25 10b up vs Scramble |
| <b>P2RY10</b>  | 2.16   | SCC25 10b down vs Scramble | ST8SIA1 | 2.34 | SCC25 10b up vs Scramble |
| <b>PADI1</b>   | 239.41 | SCC25 10b down vs Scramble | STAB2   | 2.44 | SCC25 10b up vs Scramble |
| <b>PAK3</b>    | 6.18   | SCC25 10b down vs Scramble | SUCNR1  | 1.93 | SCC25 10b up vs Scramble |
| <b>PATE4</b>   | 5.03   | SCC25 10b down vs Scramble | SV2C    | 2.25 | SCC25 10b up vs Scramble |
| <b>PBX1</b>    | 2.30   | SCC25 10b down vs Scramble | TEX13B  | 4.64 | SCC25 10b up vs Scramble |
| <b>PCDH9</b>   | 2.06   | SCC25 10b down vs Scramble | TFCP2L1 | 2.05 | SCC25 10b up vs Scramble |
| <b>PCDHGB2</b> | 2.73   | SCC25 10b down vs Scramble | THEM5   | 2.11 | SCC25 10b up vs Scramble |
| <b>PDILT</b>   | 2.36   | SCC25 10b down vs Scramble | TMED11P | 4.21 | SCC25 10b up vs Scramble |
| <b>PECAM1</b>  | 2.08   | SCC25 10b down vs Scramble | TMEM174 | 2.62 | SCC25 10b up vs Scramble |
| <b>PIK3C2G</b> | 2.29   | SCC25 10b down vs Scramble | TMEM211 | 2.42 | SCC25 10b up vs Scramble |
| <b>PLA2G2C</b> | 2.13   | SCC25 10b down vs Scramble | TMEM35  | 2.38 | SCC25 10b up vs Scramble |
| <b>PLA2G2D</b> | 4.26   | SCC25 10b down vs Scramble | TMOD2   | 2.04 | SCC25 10b up vs Scramble |

|                 |      |                            |         |       |                          |
|-----------------|------|----------------------------|---------|-------|--------------------------|
|                 |      | Scramble                   |         |       |                          |
| <b>PLA2G2F</b>  | 2.47 | SCC25 10b down vs Scramble | TMSB4Y  | 2.36  | SCC25 10b up vs Scramble |
| <b>PLCXD3</b>   | 2.12 | SCC25 10b down vs Scramble | TNFRSF9 | 24.07 | SCC25 10b up vs Scramble |
| <b>PLD5</b>     | 2.16 | SCC25 10b down vs Scramble | TPD52L3 | 6.25  | SCC25 10b up vs Scramble |
| <b>PLUNC</b>    | 2.19 | SCC25 10b down vs Scramble | TRPC2   | 1.95  | SCC25 10b up vs Scramble |
| <b>POU5F2</b>   | 4.74 | SCC25 10b down vs Scramble | TTY6    | 2.13  | SCC25 10b up vs Scramble |
| <b>PROX2</b>    | 2.40 | SCC25 10b down vs Scramble | TUBA3D  | 2.24  | SCC25 10b up vs Scramble |
| <b>PRSS57</b>   | 2.05 | SCC25 10b down vs Scramble | TULP1   | 2.46  | SCC25 10b up vs Scramble |
| <b>PSORS1C2</b> | 2.09 | SCC25 10b down vs Scramble | UBE2DNL | 1.95  | SCC25 10b up vs Scramble |
| <b>RAB33B</b>   | 7.61 | SCC25 10b down vs Scramble | UGT8    | 21.52 | SCC25 10b up vs Scramble |
| <b>RGR</b>      | 2.42 | SCC25 10b down vs Scramble | UPP2    | 2.21  | SCC25 10b up vs Scramble |
| <b>RHOF</b>     | 7.02 | SCC25 10b down vs Scramble | WDR72   | 10.90 | SCC25 10b up vs Scramble |
| <b>RNASE8</b>   | 2.80 | SCC25 10b down vs Scramble | WFDC5   | 2.15  | SCC25 10b up vs Scramble |
| <b>RPE65</b>    | 6.12 | SCC25 10b down vs Scramble | X57723  | 2.33  | SCC25 10b up vs Scramble |

|                 |       |                            |         |      |                          |
|-----------------|-------|----------------------------|---------|------|--------------------------|
| <b>RPS6KL1</b>  | 1.97  | SCC25 10b down vs Scramble | ZBTB38  | 2.64 | SCC25 10b up vs Scramble |
| <b>RRN3P2</b>   | 2.63  | SCC25 10b down vs Scramble | ZDHHC22 | 2.01 | SCC25 10b up vs Scramble |
| <b>RTL1</b>     | 3.03  | SCC25 10b down vs Scramble | ZNF227  | 2.23 | SCC25 10b up vs Scramble |
| <b>SCARNA16</b> | 2.01  | SCC25 10b down vs Scramble | ZNF804B | 8.76 | SCC25 10b up vs Scramble |
| <b>SDK2</b>     | 2.50  | SCC25 10b down vs Scramble | ZP4     | 2.21 | SCC25 10b up vs Scramble |
| <b>SEZ6L</b>    | 4.09  | SCC25 10b down vs Scramble |         |      |                          |
| <b>SIGLECP3</b> | 1.93  | SCC25 10b down vs Scramble |         |      |                          |
| <b>SLC17A2</b>  | 2.01  | SCC25 10b down vs Scramble |         |      |                          |
| <b>SLC17A3</b>  | 2.17  | SCC25 10b down vs Scramble |         |      |                          |
| <b>SLC22A9</b>  | 3.04  | SCC25 10b down vs Scramble |         |      |                          |
| <b>SLC5A7</b>   | 2.03  | SCC25 10b down vs Scramble |         |      |                          |
| <b>SLC5A9</b>   | 2.61  | SCC25 10b down vs Scramble |         |      |                          |
| <b>SLC6A12</b>  | 2.63  | SCC25 10b down vs Scramble |         |      |                          |
| <b>SLC9A3</b>   | 11.77 | SCC25 10b down vs          |         |      |                          |

|                |       |                               |
|----------------|-------|-------------------------------|
|                |       | Scramble                      |
| <b>SLFN12</b>  | 7.40  | SCC25 10b down vs<br>Scramble |
| <b>SNORA26</b> | 2.86  | SCC25 10b down vs<br>Scramble |
| <b>SNX20</b>   | 38.82 | SCC25 10b down vs<br>Scramble |
| <b>SPATA19</b> | 2.77  | SCC25 10b down vs<br>Scramble |
| <b>SPINK4</b>  | 4.28  | SCC25 10b down vs<br>Scramble |
| <b>SSPO</b>    | 7.86  | SCC25 10b down vs<br>Scramble |
| <b>SSTR2</b>   | 2.72  | SCC25 10b down vs<br>Scramble |
| <b>STK32A</b>  | 1.97  | SCC25 10b down vs<br>Scramble |
| <b>STON2</b>   | 2.17  | SCC25 10b down vs<br>Scramble |
| <b>SUN3</b>    | 2.10  | SCC25 10b down vs<br>Scramble |
| <b>SUSD5</b>   | 2.48  | SCC25 10b down vs<br>Scramble |
| <b>SYCP3</b>   | 1.90  | SCC25 10b down vs<br>Scramble |
| <b>TACR1</b>   | 3.06  | SCC25 10b down vs<br>Scramble |

|                |       |                            |
|----------------|-------|----------------------------|
| <b>TAGLN3</b>  | 2.12  | SCC25 10b down vs Scramble |
| <b>TCF24</b>   | 1.97  | SCC25 10b down vs Scramble |
| <b>TEX28</b>   | 2.01  | SCC25 10b down vs Scramble |
| <b>TGIF2LY</b> | 4.69  | SCC25 10b down vs Scramble |
| <b>TM4SF4</b>  | 6.43  | SCC25 10b down vs Scramble |
| <b>TMEM235</b> | 2.37  | SCC25 10b down vs Scramble |
| <b>TP63</b>    | 2.57  | SCC25 10b down vs Scramble |
| <b>TRIM40</b>  | 10.71 | SCC25 10b down vs Scramble |
| <b>TRPV6</b>   | 4.40  | SCC25 10b down vs Scramble |
| <b>TRUB1</b>   | 3.14  | SCC25 10b down vs Scramble |
| <b>TSSK2</b>   | 3.45  | SCC25 10b down vs Scramble |
| <b>TTLL10</b>  | 2.78  | SCC25 10b down vs Scramble |
| <b>TTLL13</b>  | 2.11  | SCC25 10b down vs Scramble |
| <b>TTY4C</b>   | 5.93  | SCC25 10b down vs Scramble |

|                |      |                               |
|----------------|------|-------------------------------|
|                |      | Scramble                      |
| <b>VGLL2</b>   | 2.53 | SCC25 10b down vs<br>Scramble |
| <b>WISP1</b>   | 3.09 | SCC25 10b down vs<br>Scramble |
| <b>WNT2B</b>   | 1.97 | SCC25 10b down vs<br>Scramble |
| <b>XKRX</b>    | 2.02 | SCC25 10b down vs<br>Scramble |
| <b>XPNPEP3</b> | 2.05 | SCC25 10b down vs<br>Scramble |
| <b>ZAR1L</b>   | 2.40 | SCC25 10b down vs<br>Scramble |
| <b>ZNF215</b>  | 7.58 | SCC25 10b down vs<br>Scramble |
| <b>ZNF833P</b> | 1.99 | SCC25 10b down vs<br>Scramble |
